# Supplementary material
Source: PubMed Central journal article supplement (PMC6435268)
Supplement: NIHMS1014969-supplement-Supplementary_material.pdf [file NIHMS1014969-supplement-Supplementary_material.pdf]

**Supplementary Table: Disease distribution and dysplasia characteristics by disease type**

|                                    | Undetected-<br>HGD/CRC <sup>a</sup><br>(n=20) | Detected-<br>HGD/CRC<br>(n=50) | p value <sup>b</sup> |
|------------------------------------|-----------------------------------------------|--------------------------------|----------------------|
| <b>Disease Type (n, %)</b>         |                                               |                                | 0.70                 |
| <b>Ulcerative colitis (UC)</b>     | 14 (70)                                       | 33 (66)                        |                      |
| <b>Crohn's colitis (CD)</b>        | 5 (25)                                        | 16 (32)                        |                      |
| <b>Indeterminate</b>               | 1 (5)                                         | 1 (2)                          |                      |
| <b>Disease distribution (n, %)</b> |                                               |                                | <0.01                |
| <b>Rectum</b>                      | 3 (15)                                        | 0 (0)                          |                      |
| <b>UC</b>                          | 3 (100)                                       | -                              |                      |
| <b>CD</b>                          | 0 (0)                                         | -                              |                      |
| <b>Indeterminate</b>               | 0 (0)                                         | -                              |                      |
| <b>Left-sided</b>                  | 2 (10)                                        | 38 (76)                        |                      |
| <b>UC</b>                          | 1 (50)                                        | 28 (74)                        |                      |
| <b>CD</b>                          | 1 (50)                                        | 10 (26)                        |                      |
| <b>Indeterminate</b>               | 0 (0)                                         | 0 (0)                          |                      |
| <b>Pancolitis</b>                  | 11 (55)                                       | 10 (20)                        |                      |
| <b>UC</b>                          | 10 (91)                                       | 6 (60)                         |                      |
| <b>CD</b>                          | 0 (0)                                         | 3 (30)                         |                      |
| <b>Indeterminate</b>               | 1 (9)                                         | 1 (10)                         |                      |
| <b>Small bowel</b>                 | 1 (5)                                         | 0 (0)                          |                      |
| <b>UC</b>                          | 0 (0)                                         | -                              |                      |
| <b>CD</b>                          | 1 (100)                                       | -                              |                      |
| <b>Indeterminate</b>               | 0 (0)                                         | -                              |                      |
| <b>Ileocolonic</b>                 | 3 (15)                                        | 2 (4)                          |                      |
| <b>UC</b>                          | 0 (0)                                         | 0 (0)                          |                      |
| <b>CD</b>                          | 3 (100)                                       | 2 (100)                        |                      |
| <b>Indeterminate</b>               | 0 (0)                                         | 0 (0)                          |                      |
| <b>History of Dysplasia (n, %)</b> |                                               |                                | <0.01                |
| <b>None</b>                        | 2 (10)                                        | 0 (0)                          |                      |
| <b>UC</b>                          | 0 (0)                                         | -                              |                      |
| <b>CD</b>                          | 2 (100)                                       | -                              |                      |
| <b>Indeterminate</b>               | 0 (0)                                         | -                              |                      |
| <b>Indefinite</b>                  | 3 (15)                                        | 0 (0)                          |                      |
| <b>UC</b>                          | 2 (67)                                        | -                              |                      |
| <b>CD</b>                          | 0 (0)                                         | -                              |                      |
| <b>Indeterminate</b>               | 1 (33)                                        | -                              |                      |
| <b>Low-grade dysplasia (LGD)</b>   | 15 (75)                                       | 0 (0)                          |                      |
| <b>UC</b>                          | 12 (80)                                       | -                              |                      |
| <b>CD</b>                          | 3 (20)                                        | -                              |                      |
| <b>Indeterminate</b>               | 0 (0)                                         | -                              |                      |
| <b>High-grade dysplasia (HGD)</b>  | 0 (0)                                         | 31 (62)                        |                      |
| <b>UC</b>                          | -                                             | 24 (77)                        |                      |
| <b>CD</b>                          | -                                             | 6 (20)                         |                      |
| <b>Indeterminate</b>               | -                                             | 1 (3)                          |                      |

|                                                 |         |         |      |
|-------------------------------------------------|---------|---------|------|
| <b>Colorectal cancer (CRC)</b>                  | 0 (0)   | 19 (38) |      |
| <b>UC</b>                                       | -       | 9 (47)  |      |
| <b>CD</b>                                       | -       | 10 (53) |      |
| <b>Indeterminate</b>                            | -       | 0 (0)   |      |
| <b>Dysplasia location on Colonoscopy (n, %)</b> |         |         | 0.03 |
| <b>Rectum</b>                                   | 3 (18)  | 18 (37) |      |
| <b>UC</b>                                       | 2 (67)  | 10 (56) |      |
| <b>CD</b>                                       | 0 (0)   | 8 (44)  |      |
| <b>Indeterminate</b>                            | 1(33)   | 0 (0)   |      |
| <b>Left</b>                                     | 2 (12)  | 13 (27) |      |
| <b>UC</b>                                       | 2 (100) | 9 (69)  |      |
| <b>CD</b>                                       | 0 (0)   | 3 (23)  |      |
| <b>Indeterminate</b>                            | 0 (0)   | 1 (8)   |      |
| <b>Right</b>                                    | 6 (35)  | 14 (29) |      |
| <b>UC</b>                                       | 5 (83)  | 9 (64)  |      |
| <b>CD</b>                                       | 1 (17)  | 5 (36)  |      |
| <b>Indeterminate</b>                            | 0 (0)   | 0 (0)   |      |
| <b>Multifocal</b>                               | 6 (35)  | 4 (8)   |      |
| <b>UC</b>                                       | 4 (66)  | 4 (100) |      |
| <b>CD</b>                                       | 1 (17)  | 0 (0)   |      |
| <b>Indeterminate</b>                            | 1 (17)  | 0 (0)   |      |

<sup>a</sup> HGD: high-grade dysplasia; CRC: colorectal cancer

<sup>b</sup> p values for significant difference in distribution of proportions and p value for difference in median age at diagnosis, number of colonoscopies, and number of biopsies.
